# Supplementary material for: Effectiveness of a Computerized Home-Based Cognitive Stimulation Program for Treating Cancer-Related Cognitive Impairment
Source: MDPI journal article supplement (doi:10.3390/ijerph20064953), 2023-03-11
Supplement: s1 [file s1]

**Supplementary Material 1.** Additional analyses results.

**Table S1.** Within subject effect Repeated measures ANOVA.

| Cases                                                                                    | Sphericity Correction | Sum of Squares         | df                 | Mean Square | F                   | p                   | $\eta^2$ |
|------------------------------------------------------------------------------------------|-----------------------|------------------------|--------------------|-------------|---------------------|---------------------|----------|
| Pre-Post                                                                                 | None                  | 654.57                 | 1.000              | 654.57      | 1.254               | 0.300               | 0.001    |
| Pre-Post * Lapsed time between the end of chemo treatment and the beginning of the study | None                  | 2915.81                | 1.000              | 2915.81     | 5.586               | 0.050               | 0.006    |
| Pre-Post * Age at the beginning of the study                                             | None                  | 1.02                   | 1.000              | 1.02        | 0.002               | 0.966               | < 0.001  |
| Residuals                                                                                | None                  | 3653.83                | 7.000              | 521.97      |                     |                     |          |
| Test                                                                                     | None                  | 267305.25 <sup>a</sup> | 6.000 <sup>a</sup> | 44550.87    | 15.142 <sup>a</sup> | < .001 <sup>a</sup> | 0.575    |
|                                                                                          | Greenhouse-Geisser    | 267305.25              | 1.227              | 217802.15   | 15.142              | 0.003               | 0.575    |
| Test * Lapsed time between the end of chemo treatment and the beginning of the study     | None                  | 5954.60 <sup>a</sup>   | 6.000 <sup>a</sup> | 992.43      | 0.337 <sup>a</sup>  | 0.913 <sup>a</sup>  | 0.013    |
|                                                                                          | Greenhouse-Geisser    | 5954.60                | 1.227              | 4851.85     | 0.337               | 0.621               | 0.013    |
| Test * Age at the beginning of the study                                                 | None                  | 34269.72 <sup>a</sup>  | 6.000 <sup>a</sup> | 5711.62     | 1.941 <sup>a</sup>  | 0.096 <sup>a</sup>  | 0.074    |
|                                                                                          | Greenhouse-Geisser    | 34269.72               | 1.227              | 27923.20    | 1.941               | 0.201               | 0.074    |
| Residuals                                                                                | None                  | 123568.63              | 42.000             | 2942.11     |                     |                     |          |
|                                                                                          | Greenhouse-Geisser    | 123568.63              | 8.591              | 14383.51    |                     |                     |          |

*Note.* Sphericity corrections not available for factors with 2 levels.

*Note.* Type III Sum of Squares.

<sup>a</sup> Mauchly's test of sphericity indicates that the assumption of sphericity is violated ( $p < .05$ ).
